# Supplementary material for: Potential pandemic risk of circulating swine H1N2 influenza viruses
Source: PubMed Central journal article supplement (PMC11176300; doi:10.1038/s41467-024-49117-z), 2024-06-13
Supplement: 41467_2024_49117_MOESM1_ESM.pdf [file 41467_2024_49117_MOESM1_ESM.pdf]

# H1 1A classical swine lineage

- 1A.3.3.3 (n=806)
  - 1A.3.3.2/pdm (n=264)
  - 1A.2 (n=13)
  - 1A.4 (n=26)
  - 1A.1.1.3 (n=237)
  - 1A.1.1.1 (n=1)
- # Characterized strains
- ★ H1v candidate vaccine virus
- H1N1pdm seasonal vaccines
- A/Hawaii/70/2019
- Reported H1v cases

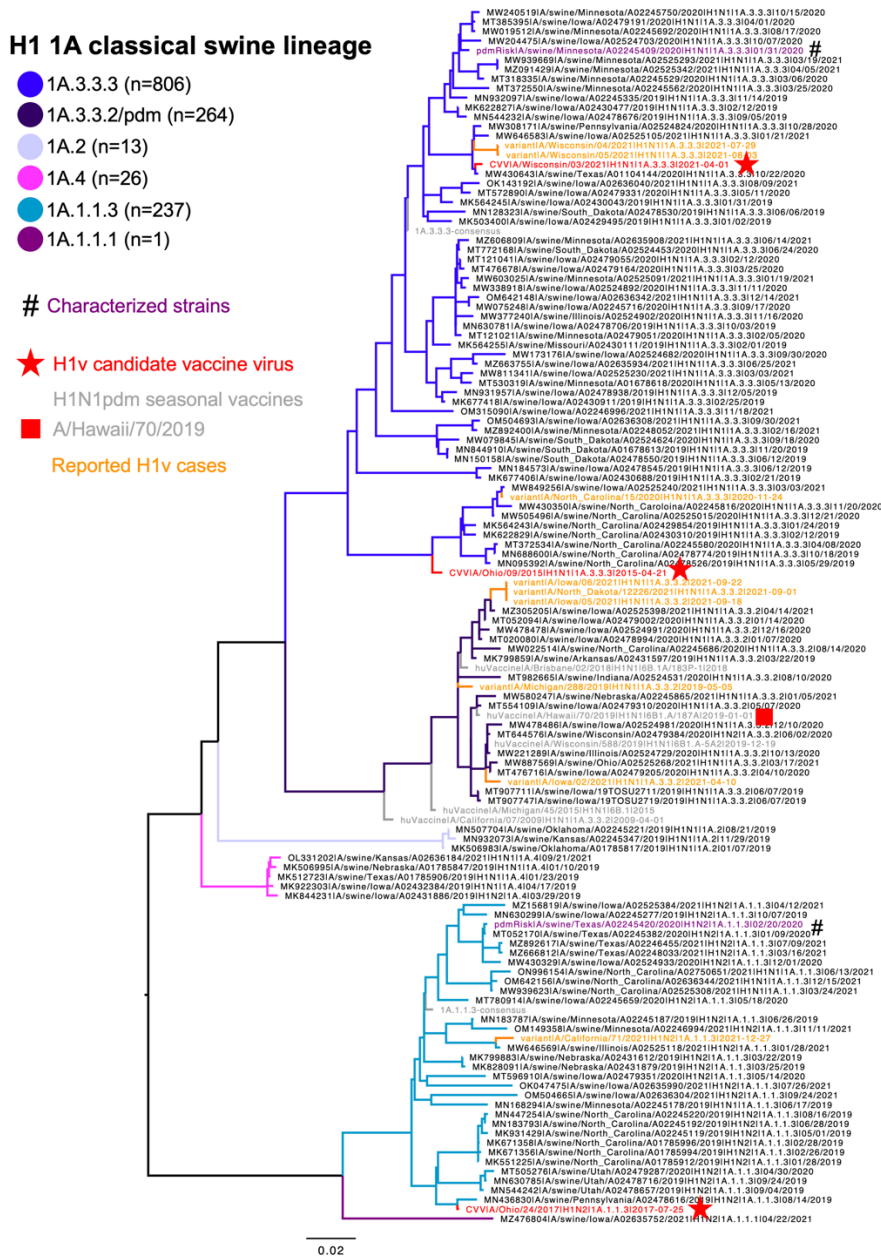

**Supplementary Figure 1. Representative phylogenetic relationships of North American swine H1 1A classical swine lineage influenza A viruses from 2019 to 2021.** Each genetic clade was proportionately down sampled using smot<sup>64</sup> and branches were colored. Swine influenza A virus strains characterized are marked by hash signs (#) and colored purple with the genetic clade consensus colored gray. The numbers in parentheses in the color key indicate number of each genetic clade detected between 2019 and 2021. Human seasonal H1 vaccine strains were colored gray; candidate vaccine viruses were colored red; and reported H1 variant cases detected between 2019 and 2021 were colored orange. The tree was midpoint rooted; all branch lengths are drawn to scale, and the scale bar indicates the number of nucleotide substitutions per site. The complete H1 phylogeny and input data are presented at <https://github.com/flu-crew/datasets>.

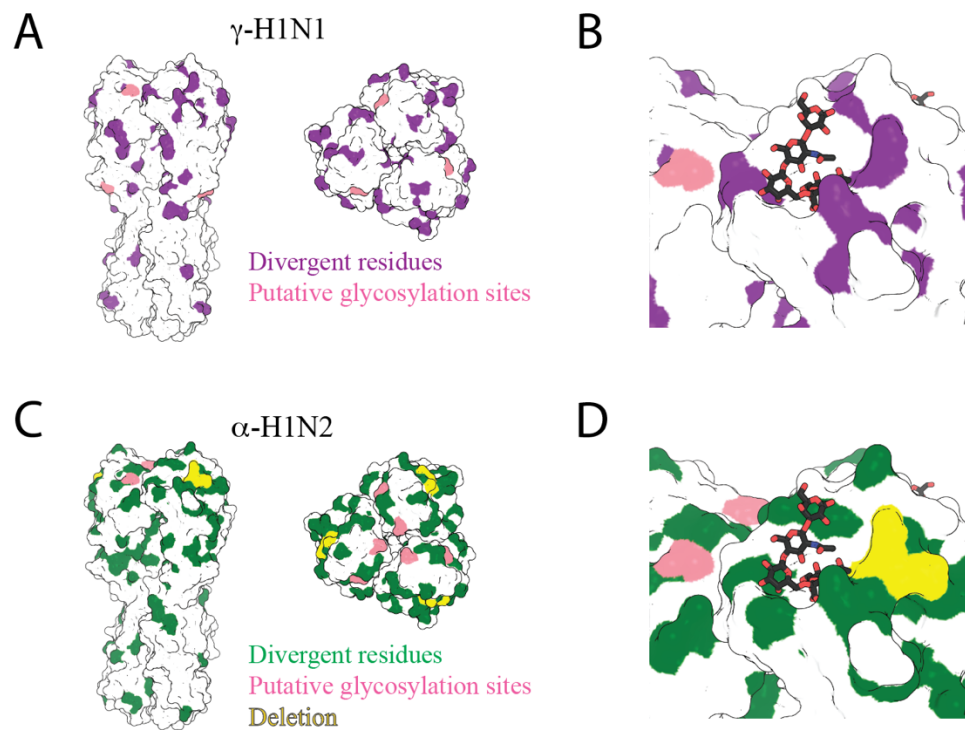

**Supplementary Figure 2. HA structure comparison between H1N1pdm09 and swine viruses.** (A) Top and side views of a surface representation of HA colored to compare the amino acid sequence of H1N1pdm09 HA and  $\gamma$ -swH1N1. Differences in amino acid sequences are represented in purple and differential putative glycosylation sites are colored pink. (B)  $\gamma$ -swH1N1 receptor binding site including  $\alpha$ 2-6-linked SA (sticks). (C) Top and side views of a surface representation of HA comparing the amino acid sequence of H1N1pdm09 HA and  $\alpha$ -swH1N2. Differences in amino acid sequences are represented in green and differential putative glycosylation sites are colored pink. The two amino acid residue deletion at residue 133 and 133a (H3N2 numbering) in  $\alpha$ -swH1N2 HA are highlighted in yellow. (D)  $\alpha$ -swH1N2 receptor binding site including  $\alpha$ 2-6-linked SA (sticks). Images created in PyMOL and is based on PDB 3UBE.

## Transmission to H3-immune recipients

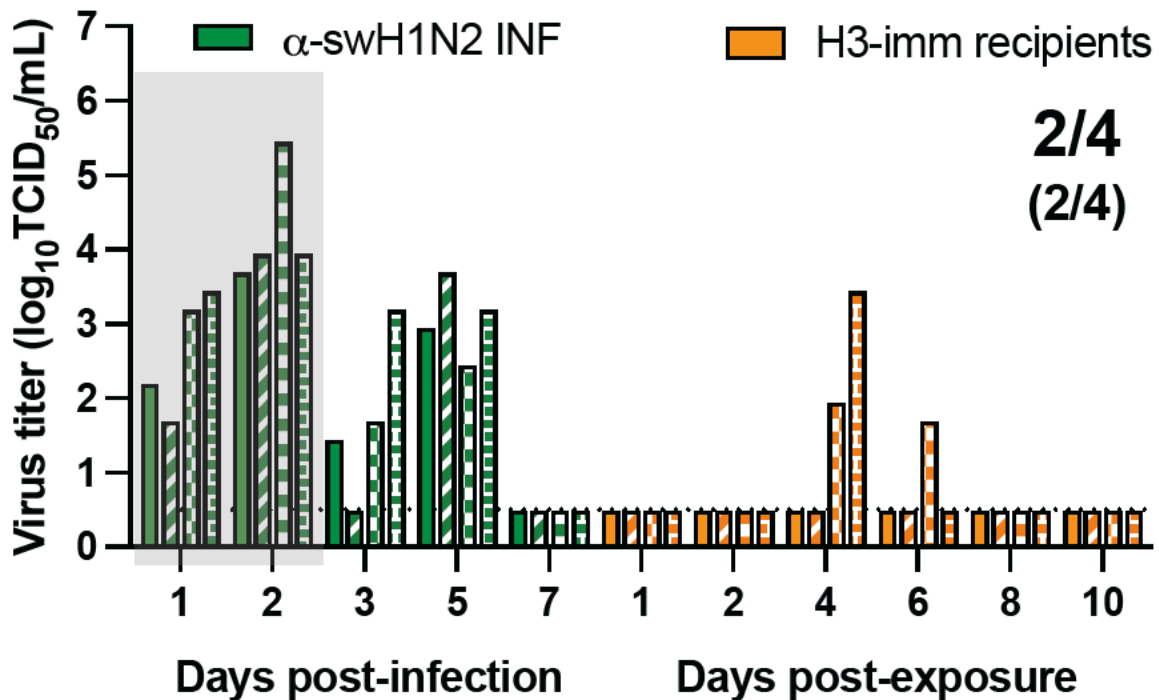

**Supplementary Figure 3. α-swH1N2 transmission to H3N2-imm recipients.** Four ferrets were infected with H3N2 A/Perth/16/2009 strain (H3N2-imm) 137 days prior to acting as recipients to α-swH1N2 infected donors. Four donor ferrets were infected with α-swH1N2 and H3N2-imm recipients were placed in the adjacent cage 24 hours later. Nasal washes were collected from all ferrets on the indicated days and titered for virus by TCID<sub>50</sub>. Each bar indicates an individual ferret. For all graphs, the number of recipient ferrets with detectable virus in nasal secretions out of four total is shown; the number of recipient animals that seroconverted at 14- or 21-days post α-swH1N2 exposure out of four total is shown in parentheses. Gray shaded box indicates shedding of the donor during the exposure period. The limit of detection is indicated by the dashed line.

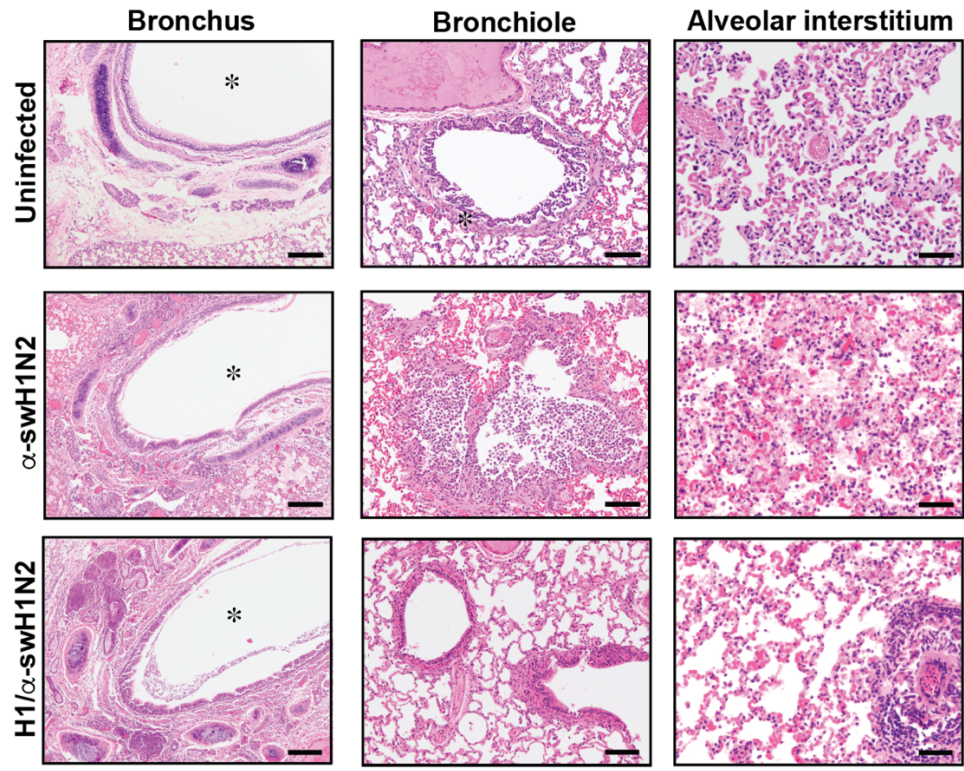

**Supplementary Figure 4. Lung pathology caused by swine a-H1N2 influenza virus is more severe in ferrets with no prior immunity.** Lungs from uninfected or  $\alpha$ -swH1N2 infected ferrets without or with H1N1pdm09 pre-existing immunity (from Figure 7D) were harvested at 3 dpi. Histopathology was examined by H&E staining. N=2 for each group. Bronchus and bronchiole are at 20x magnification and alveolar interstitium is at 10x. Scale bar is 100 mm for bronchus and bronchiole and 200 mm for alveolar interstitium. Asterisks indicate the large airway.

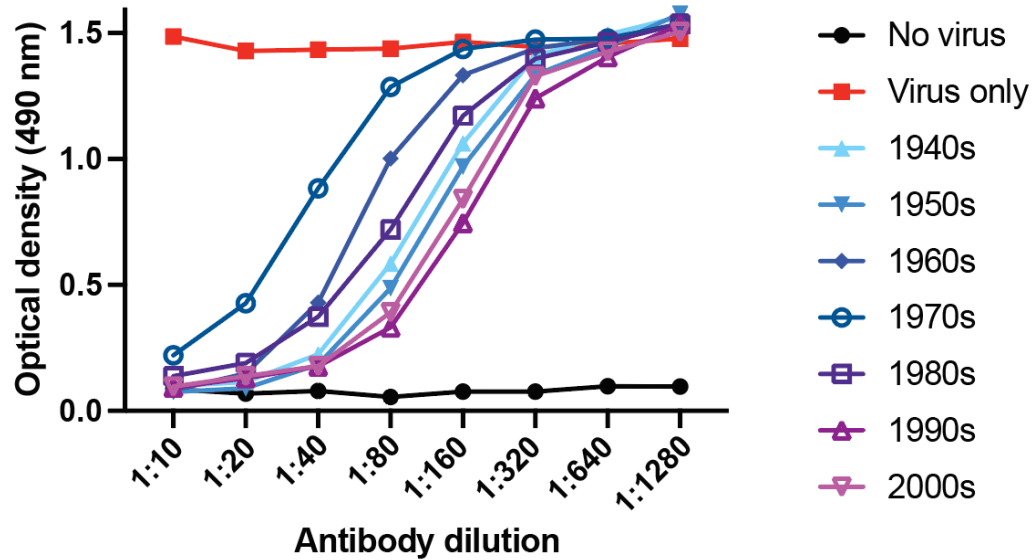

**Supplementary Figure 5. Detection of human anti-NA antibodies that block NA activity.** Serially diluted human sera, pooled by birth year, was incubated with an H9 reassortant bearing a NA antigens from A/swine/NY/A01104005/2011. Inhibition of NA activity was tested using fetuin substrate coated plates. Negative control with PBS only (no virus) and positive control with no serum were added as comparators. The data are representative of three experiments run in duplicate.

Supplementary Table 1: Glycan Structures on Microarray

|   | Catalogue | Structure                                                                                                                                                                                        | Symbol                                                                               |
|---|-----------|--------------------------------------------------------------------------------------------------------------------------------------------------------------------------------------------------|--------------------------------------------------------------------------------------|
| 1 | M040      | Gal $\beta$ (1-4)-GlcNAc $\beta$ -ethyl-NH <sub>2</sub>                                                                                                                                          | 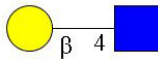   |
| 2 | M221      |                                                                                                                                                                                                  |    |
| 3 | M222      |                                                                                                                                                                                                  |    |
| 4 | M009      | Gal $\beta$ (1-4)-GlcNAc $\beta$ (1-2)-Man $\alpha$ (1-3)-[Gal $\beta$ (1-4)-GlcNAc $\beta$ (1-2)-Man $\alpha$ (1-6)]-Man $\beta$ (1-4)-GlcNAc $\beta$ (1-4)-GlcNAc $\beta$ -Asn-NH <sub>2</sub> |  |
| 5 | M226      |                                                                                                                                                                                                  |  |
| 6 | M227      |                                                                                                                                                                                                  |  |
| 7 | SW29      | NeuAca(2-3)-Gal $\beta$ (1-4)-GlcNAc $\beta$ -ethyl-NH <sub>2</sub>                                                                                                                              |   |

|    |      |                                                                                                                                                            |                                                                                      |
|----|------|------------------------------------------------------------------------------------------------------------------------------------------------------------|--------------------------------------------------------------------------------------|
| 8  | SW30 | NeuAc $\alpha$ (2-3)-Gal $\beta$ (1-4)-GlcNAc $\beta$ (1-3)-Gal $\beta$ (1-4)-GlcNAc $\beta$ -ethyl-NH <sub>2</sub>                                        | 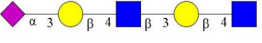   |
| 9  | SW31 | NeuAc $\alpha$ (2-3)-Gal $\beta$ (1-4)-GlcNAc $\beta$ (1-3)-Gal $\beta$ (1-4)-GlcNAc $\beta$ (1-3)-Gal $\beta$ (1-4)-GlcNAc $\beta$ -ethyl-NH <sub>2</sub> |    |
| 10 | M045 | NeuAc $\alpha$ (2-3)-Gal $\beta$ (1-3)-GalNAc $\alpha$ -Thr-NH <sub>2</sub>                                                                                |    |
| 11 | M120 | 3' NeuAc LN Core 1 (1163)                                                                                                                                  |    |
| 12 | M128 | 3' NeuAc DiLN Core 1 (1528)                                                                                                                                |  |
| 13 | M142 | 3' NeuAc TetraLN Core 1 (2259)                                                                                                                             |  |
| 14 | M143 | 3' NeuAc PentaLN Core 1 (2624)                                                                                                                             |  |
| 15 | M050 | NeuAc $\alpha$ (2-3)-Gal $\beta$ (1-4)-GlcNAc $\beta$ (1-6)-[Gal $\beta$ (1-3)]-GalNAc $\alpha$ -Thr-NH <sub>2</sub>                                       |  |



|    |      |                                                                                                                                                                        |  |
|----|------|------------------------------------------------------------------------------------------------------------------------------------------------------------------------|--|
| 16 | M053 | NeuAca(2-3)-Galβ(1-4)-GlcNAcβ(1-3)-Galβ(1-4)-GlcNAcβ(1-6)-[Galβ(1-3)]-GalNAcα-Thr-NH <sub>2</sub>                                                                      |  |
| 17 | M202 | 3' NeuAc TriLN Core 2 (1894)                                                                                                                                           |  |
| 18 | M152 | 3' NeuAc TetraLN Core 2 (2259)                                                                                                                                         |  |
| 19 | M149 | 3' NeuAc PentaLN Core 2 (2624)                                                                                                                                         |  |
| 20 | SW07 | NeuAca2-3Galb1-4GlcNAcb1-2Mana1-3(NeuAca2-3Galb1-4GlcNAcb1-2Mana1-6)Manb1-4GlcNAcb1-4GlcNAc-AsnGly                                                                     |  |
| 21 | SW08 | NeuAca2-3Galb1-4GlcNAcb1-3Galb1-4GlcNAcb1-2Mana1-3(NeuAca2-3Galb1-4GlcNAcb1-3Galb1-4GlcNAcb1-2Mana1-6)Manb1-4GlcNAcb1-4GlcNAc-AsnGly                                   |  |
| 22 | SW09 | (NeuAca2-3Galb1-4GlcNAcb1-3Galb1-4GlcNAcb1-3Galb1-4GlcNAcb1-2Mana1-6)NeuAca2-3Galb1-4GlcNAcb1-3Galb1-4GlcNAcb1-3Galb1-4GlcNAcb1-2Mana1-3Manb1-4GlcNAcb1-4GlcNAc-AsnGly |  |
| 23 | SW10 | NeuAca2-3Galb1-4GlcNAcb1-2Mana1-3(NeuAca2-3Galb1-4GlcNAcb1-2Mana1-6)Manb1-4GlcNAcb1-4(Fuca1-6)GlcNAc-AsnGly                                                            |  |
| 24 | SW11 | NeuAca2-3Galb1-4GlcNAcb1-3Galb1-4GlcNAcb1-2Mana1-3(NeuAca2-3Galb1-4GlcNAcb1-3Galb1-4GlcNAcb1-2Mana1-6)Manb1-4GlcNAcb1-4(Fuca1-6)GlcNAc-AsnGly                          |  |
| 25 | SW12 | NeuAca2-3Galb1-4GlcNAcb1-3Galb1-4GlcNAcb1-3Galb1-4GlcNAcb1-2Mana1-3(NeuAca2-3Galb1-4GlcNAcb1-3Galb1-4GlcNAcb1-3Galb1-4GlcNAcb1-2Mana1-6)Manb1-4GlcNAcb1-4GlcNAc-AsnGly |  |



|    |      |                                                                                                                                       |                                                                                      |
|----|------|---------------------------------------------------------------------------------------------------------------------------------------|--------------------------------------------------------------------------------------|
| 26 | M002 | NeuAca(2-3)-Galβ(1-4)-[Fuca(1-3)]-GlcNAcβ-propyl-NH <sub>2</sub>                                                                      | 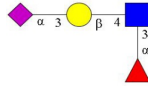    |
| 27 | M029 | NeuAca(2-3)-Galβ(1-3)-[Fuca(1-4)]-GlcNAcβ(1-3)-Galβ(1-4)-[Fuca(1-3)]-GlcNAcβ-ethyl-NH <sub>2</sub>                                    |    |
| 28 | M022 | NeuAca(2-3)-Galβ(1-4)-[Fuca(1-3)]-GlcNAcβ(1-3)-Galβ(1-4)-[Fuca(1-3)]-GlcNAcβ-ethyl-NH <sub>2</sub>                                    |    |
| 29 | M015 | NeuAca(2-3)-Galβ(1-4)-[Fuca(1-3)]-GlcNAcβ(1-3)-Galβ(1-4)-[Fuca(1-3)]-GlcNAcβ(1-3)-Galβ(1-4)-[Fuca(1-3)]-GlcNAcβ-ethyl-NH <sub>2</sub> |    |
| 30 | M206 | 3' SLeX TriLN Core 1(2332)                                                                                                            |  |
| 31 | M147 | 3' SLeX TriLN Core 3(2170)                                                                                                            |  |
| 32 | M215 | NeuAc(2-6)-Galb(1-4)-(6S)GlcNacβ-ethyl-NH <sub>2</sub>                                                                                |  |
| 33 | M003 | NeuAca(2-6)-Galβ(1-4)-6-O-sulfo-GlcNAcβ-propyl-NH <sub>2</sub>                                                                        |  |

|    |      |                                                                                                   |  |
|----|------|---------------------------------------------------------------------------------------------------|--|
| 34 | SW32 | NeuAca(2-6)-Galβ(1-4)-GlcNAcβ-ethyl-NH <sub>2</sub>                                               |  |
| 35 | SW33 | NeuAca(2-6)-Galβ(1-4)-GlcNAcβ(1-3)-Galβ(1-4)-GlcNAcβ-ethyl-NH <sub>2</sub>                        |  |
| 36 | SW34 | NeuAca(2-6)-Galβ(1-4)-GlcNAcβ(1-3)-Galβ(1-4)-GlcNAcβ(1-3)-Galβ(1-4)-GlcNAcβ-ethyl-NH <sub>2</sub> |  |
| 37 | M121 | 6' NeuAc LN Core 1 (1163)                                                                         |  |
| 38 | M129 | 6' NeuAc DiLN Core 1 (1528)                                                                       |  |
| 39 | M154 | 6' NeuAc TriLN Core 1 (1894)                                                                      |  |
| 40 | M051 | NeuAca(2-6)-Galβ(1-4)-GlcNAcβ(1-6)-[Galβ(1-3)]-GalNAcα-Thr-NH <sub>2</sub>                        |  |
| 41 | M054 | NeuAca(2-6)-Galβ(1-4)-GlcNAcβ(1-3)-Galβ(1-4)-GlcNAcβ(1-6)-[Galβ(1-3)]-GalNAcα-Thr-NH <sub>2</sub> |  |

|    |      |                                                                                                                                                                        |  |
|----|------|------------------------------------------------------------------------------------------------------------------------------------------------------------------------|--|
| 42 | M201 | 6' NeuAc TriLN Core 2 (1894)                                                                                                                                           |  |
| 43 | M159 | 6' NeuAc TetraLN Core 2 (2259)                                                                                                                                         |  |
| 44 | M157 | 6' NeuAc PentaLN Core 2 (2624)                                                                                                                                         |  |
| 45 | SW01 | NeuAca2-6Galb1-4GlcNAcb1-2Mana1-3(NeuAca2-6Galb1-4GlcNAcb1-2Mana1-6)Manb1-4GlcNAcb1-4GlcNAc-AsnGly                                                                     |  |
| 46 | SW02 | NeuAca2-6Galb1-4GlcNAcb1-3Galb1-4GlcNAcb1-2Mana1-3(NeuAca2-6Galb1-4GlcNAcb1-3Galb1-4GlcNAcb1-2Mana1-6)Manb1-4GlcNAcb1-4GlcNAc-AsnGly                                   |  |
| 47 | SW03 | NeuAca2-6Galb1-4GlcNAcb1-3Galb1-4GlcNAcb1-3Galb1-4GlcNAcb1-2Mana1-3(NeuAca2-6Galb1-4GlcNAcb1-3Galb1-4GlcNAcb1-3Galb1-4GlcNAcb1-2Mana1-6)Manb1-4GlcNAcb1-4GlcNAc-AsnGly |  |
| 48 | SW04 | NeuAca2-6Galb1-4GlcNAcb1-2Mana1-3(NeuAca2-6Galb1-4GlcNAcb1-2Mana1-6)Manb1-4GlcNAcb1-4(Fuca1-6)GlcNAc-AsnGly                                                            |  |
| 49 | SW05 | NeuAca2-6Galb1-4GlcNAcb1-3Galb1-4GlcNAcb1-2Mana1-3(NeuAca2-6Galb1-4GlcNAcb1-3Galb1-4GlcNAcb1-3Galb1-4GlcNAcb1-2Mana1-6)Manb1-4GlcNAcb1-4(Fuca1-6)GlcNAc-AsnGly         |  |
| 50 | SW06 | NeuAca2-6Galb1-4GlcNAcb1-3Galb1-4GlcNAcb1-3Galb1-4GlcNAcb1-2Mana1-3(NeuAca2-6Galb1-4GlcNAcb1-3Galb1-4GlcNAcb1-3Galb1-4GlcNAcb1-2Mana1-6)Manb1-4GlcNAcb1-4GlcNAc-AsnGly |  |

**Supplementary Table 2: Serology of donor and recipient ferrets for each transmission study**

| Figure | Virus    | Status        | Transmission efficiency | α-swH1N2 MN titers (D0) | α-swH1N2 MN titers (D14) | α-swH1N2 MN titers (D21) | H1N1pdm09/H3N2 MN titers (D0) | H1N1pdm09/H3N2 MN titers (D14) | H1N1pdm09/H3N2 MN titers (D21) |
|--------|----------|---------------|-------------------------|-------------------------|--------------------------|--------------------------|-------------------------------|--------------------------------|--------------------------------|
| 5A     | α-swH1N2 | INF           |                         | <20, <20, <20, <20      | 80, 113, 320, 202        | NA                       | ND                            | ND                             | ND                             |
|        |          | Naïve         | 4/4                     | <20, <20, <20, <20      | 113, 40, 80, 80          | 1016, 806, 905, 905      | NA                            | NA                             | NA                             |
| 5B     | α-swH1N2 | INF           |                         | NA                      | NA                       | NA                       | NA                            | NA                             | NA                             |
|        |          | H3N2-imm      | 4/4                     | <20, <20, <20, <20      | 403, 453, 453, 453       | 905, 806, 1280, 640      | 226, 254, 1016, 320           | 2032, 905, 1016, 806           | 3620, 806, 320, 640            |
| 5C     | α-swH1N2 | INF           |                         | NA                      | NA                       | NA                       | ND                            | ND                             | ND                             |
|        |          | H1N1pdm09-imm | 4/4                     | <20, <20, <20, <20      | 50, 40, 40, 20           | 2560, 3620, 640, 905     | 7241, 2560, 2560, 2032        | 12902, 14482, 10240, 14482     | 14482, 14482, 7241, 12902      |
| 6B     | α-swH1N2 | INF           |                         | NA                      | NA                       | ND                       | ND                            | ND                             | ND                             |
|        |          | H1N1pdm09-imm | 2/4                     | <20, <20, <20, <20      | 1016, 806, <20, <20      | 1613, 640, <20, <20      | 1280, 640, 3225, 3225         | 14482, 10240, 2560, 2560       | 8127, 10240, 2560, 3620        |
| 6C     | α-swH1N2 | Naïve         | 1/4                     | <20, <20, <20, <20      | <20, 403, <20, <20       | <20, 640, <20, <20       | NA                            | NA                             | NA                             |
|        |          | INF           |                         | <20, <20, <20, <20      | 3620, 3225, 1613, 2032   | ND                       | ND                            | ND                             | ND                             |
| 6D     | α-swH1N2 | H1N1pdm09-imm | 4/4                     | <20, <20, <20, <20      | 508, 905, 806, 905       | 806, 1280, 905, 1810     | 1280, 1280, 1280, 5120        | 14482, 14482, 14482, 14482     | 12902, 7241, 10240, 14482      |
|        |          | Naïve         | 2/4                     | <20, <20, <20, <20      | <20, <20, 1613, 806      | <20, <20, 1280, 905      | NA                            | NA                             | NA                             |
| S3     | α-swH1N2 | INF           |                         | <20, <20, <20, <20      | 905, 508, 640            | ND                       | ND                            | ND                             | ND                             |
|        |          | H1N1pdm09-imm | 3/3                     | <20, <20, <20, <20      | 453, 905, 254            | 806, 1016, 403           | 1810, 1810, 3225              | 14482, 14482, 7241             | 10240, 14482, 6451             |
| S3     | α-swH1N2 | H1N1pdm09-imm | 1/3                     | <20, <20, <20, <20      | <20, 403, <20            | <20, 905, <20            | 2032, 2560, 3620              | 2560, 14482, 3620              | 2560, 14482, 3225              |
|        |          | H3N2-imm      | 2/4                     | <20, <20, <20, <20      | <20, <20, 508, 1810      | <20, <20, 1016, 403      | 453, 453, 3225, 403           | 508, 640, 14482, 806           | 508, 453, 14482, 2032          |

ND = Not determined; NA = Not available, as animals were euthanized at endpoint prior to day 14

MN = microneutralization
